# Supplementary material for: The m6A RNA Modification Quantity and mRNA Expression Level of RNA Methylation-Related Genes in Head and Neck Squamous Cell Carcinoma Cell Lines and Patients
Source: Biomolecules. 2021 Jun 18;11(6):908. doi: 10.3390/biom11060908 (PMC8235215; doi:10.3390/biom11060908)
Supplement: Supplementary file 1 [file biomolecules-11-00908-s001.zip › biomolecules-1252615-supplementary.pdf]

## Supplementary Materials

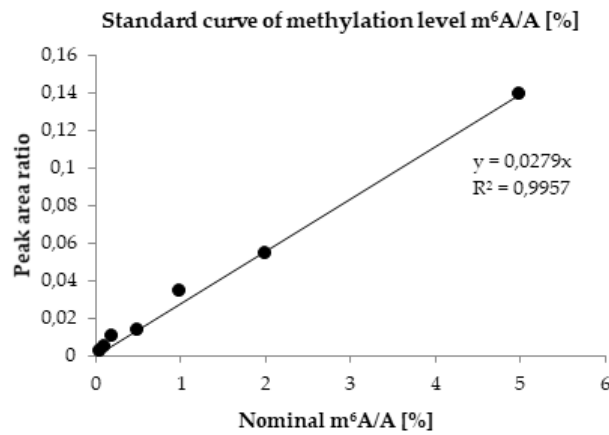

**Figure S1.** Standard curve of methylation level m<sup>6</sup>A/A [%].

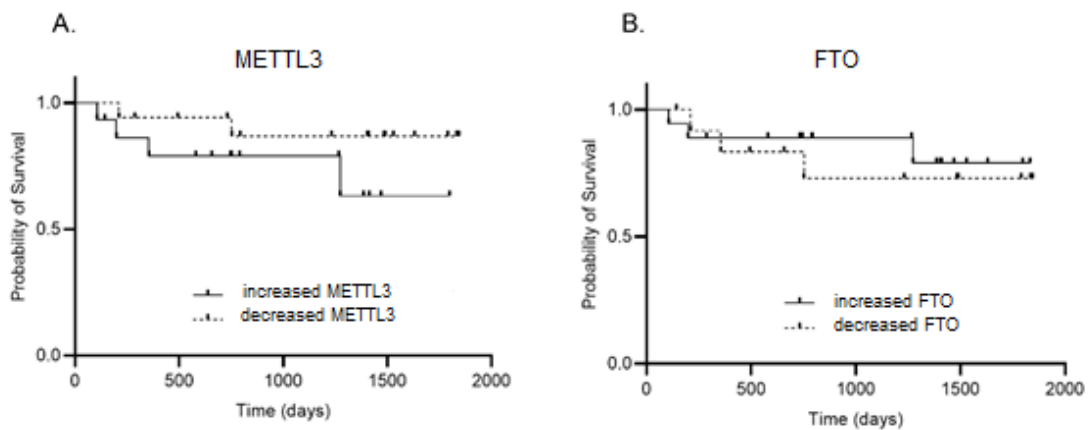

**Figure S2.** The Kaplan-Meier survival analysis of HNSCC patients according to increased/ decreased mRNA level of METTL3 (A) and FTO (B) genes in cancerous tissues compared to histopathologically unchanged tissues.

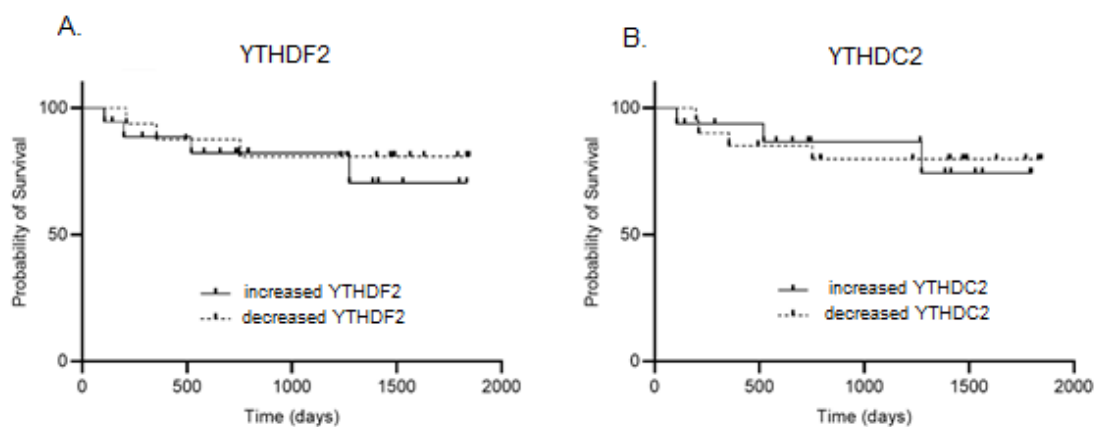

**Figure S3.** The Kaplan-Meier survival analysis of HNSCC patients according to increased/ decreased mRNA level of YTHDF2 (A) and YTHDC2 (B) genes in cancerous tissues compared to histopathologically unchanged tissues.

Table S1. Primers sequence used in qPCR analysis.

| Gene          | Sequence (5'-3')                                       |
|---------------|--------------------------------------------------------|
| <i>GAPDH</i>  | F: GTCTCCTCTGACTTCAACAGCG<br>R: ACCACCCTGTTGCTGTAGCCAA |
| <i>METTL3</i> | F: TTTTCCGGTTAGCCTTCGGG<br>R: GATAGAGCTCCACGTGTCCG     |
| <i>FTO</i>    | F: ACTTGGCTCCCTTATCTGACC<br>R: TGTGCAGTGTGAGAAAGGCTT   |
| <i>YTHDF2</i> | F: AACTGCGACACATTGCGCTA<br>R: TCTCTGGTTCCTCCTCCCTAA    |
| <i>YTHDC2</i> | F: TTGGATGAGGGCCTTTGGTTT<br>R: CCATTGGTCCTTGTGTCTCAC   |

F- forward primer

R- reverse primer

Table S2. m<sup>6</sup>A/A ratio in cancerous and histopathologically unchanged tissue samples from patients with HNSCC

| Characteristic                            | Cancerous tissue                                           | Histopathologically unchanged tissue                       | p-value |
|-------------------------------------------|------------------------------------------------------------|------------------------------------------------------------|---------|
|                                           | Median (range) <sup>a</sup> or<br>Mean (± SD) <sup>b</sup> | Median (range) <sup>a</sup> or<br>Mean (± SD) <sup>b</sup> |         |
| <b>Age at the time of surgery (years)</b> |                                                            |                                                            |         |
| ≤60                                       | 0.11 ± 0.04 <sup>b</sup>                                   | 0.11 ± 0.04 <sup>b</sup>                                   | 0.74    |
| >60                                       | 0.12 ± 0.04 <sup>b</sup>                                   | 0.11 ± 0.04 <sup>b</sup>                                   | 0.56    |
| <b>Gender</b>                             |                                                            |                                                            |         |
| Male                                      | 0.11 ± 0.03 <sup>b</sup>                                   | 0.11 ± 0.03 <sup>b</sup>                                   | 0.86    |
| Female                                    | 0.13 ± 0.04 <sup>b</sup>                                   | 0.11 ± 0.04 <sup>b</sup>                                   | 0.23    |
| <b>Tumor stage (TNM classification)</b>   |                                                            |                                                            |         |
| T1                                        | 0.12 ± 0.05 <sup>b</sup>                                   | 0.14 ± 0.05 <sup>b</sup>                                   | 0.64    |
| T2                                        | 0.13 ± 0.05 <sup>b</sup>                                   | 0.11 ± 0.04 <sup>b</sup>                                   | 0.20    |
| T3                                        | 0.10 ± 0.03 <sup>b</sup>                                   | 0.10 ± 0.02 <sup>b</sup>                                   | 0.82    |
| T4                                        | 0.11 [0.08-0.21] <sup>a</sup>                              | 0.11 [0.06-0.18] <sup>a</sup>                              | 0.90    |
| N0                                        | 0.11 [0.08-0.22] <sup>a</sup>                              | 0.11 [0.06-0.17] <sup>a</sup>                              | 0.71    |
| N1                                        | 0.12 ± 0.04 <sup>b</sup>                                   | 0.12 ± 0.03 <sup>b</sup>                                   | 0.88    |
| N2                                        | 0.12 ± 0.05 <sup>b</sup>                                   | 0.13 ± 0.04 <sup>b</sup>                                   | 0.76    |
| N3                                        | 0.078 ± 0.03 <sup>b</sup>                                  | 0.084 ± 0.03 <sup>b</sup>                                  | 0.83    |
| <b>Histologic grade</b>                   |                                                            |                                                            |         |
| G1                                        | 0.14 [0.08-0.20] <sup>a</sup>                              | 0.11 [0.09-0.18] <sup>a</sup>                              | 0.48    |
| G2                                        | 0.11 [0.04-0.22] <sup>a</sup>                              | 0.11 [0.05-0.18] <sup>a</sup>                              | 0.87    |
| G3                                        | 0.11 [0.08-0.17] <sup>a</sup>                              | 0.09 [0.06-0.18] <sup>a</sup>                              | 0.39    |
| <b>Anatomical site</b>                    |                                                            |                                                            |         |
| Larynx                                    | 0.11 [0.08-0.17] <sup>a</sup>                              | 0.10 [0.07-0.18] <sup>a</sup>                              | 0.71    |
| Oral cavity                               | 0.11 [0.04-0.22] <sup>a</sup>                              | 0.11 [0.05-0.18] <sup>a</sup>                              | 0.95    |
| Oropharynx                                | 0.13 ± 0.02 <sup>b</sup>                                   | 0.09 ± 0.03 <sup>b</sup>                                   | 0.12    |

Depending on the data distribution we performed the U Mann-Whitney test<sup>a</sup> or unpaired t-test with Welch's correction<sup>b</sup>.

**Table S3.** *METTL3* transcript levels in cancerous and histopathologically unchanged tissue samples from patients with HNSCC.

| Characteristic                     | Cancerous tissue                                                | Histopathologically unchanged tissue                            | p-value |
|------------------------------------|-----------------------------------------------------------------|-----------------------------------------------------------------|---------|
|                                    | Median (range) <sup>a</sup> or<br>Mean ( $\pm$ SD) <sup>b</sup> | Median (range) <sup>a</sup> or<br>Mean ( $\pm$ SD) <sup>b</sup> |         |
| Age at the time of surgery (years) |                                                                 |                                                                 |         |
| ≤60                                | 0.84 [0.24-2.90] <sup>a</sup>                                   | 0.92 [0.17-3.63] <sup>a</sup>                                   | 0.89    |
| >60                                | 0.89 [0.26-3.48] <sup>a</sup>                                   | 0.70 [0.31-3.38] <sup>a</sup>                                   | 0.40    |
| Gender                             |                                                                 |                                                                 |         |
| Male                               | 0.83 [0.26-2.97] <sup>a</sup>                                   | 0.70 [1.7-3.38] <sup>a</sup>                                    | 0.73    |
| Female                             | 1.65 $\pm$ 1.17 <sup>b</sup>                                    | 1.38 $\pm$ 1.14 <sup>b</sup>                                    | 0.56    |
| Tumor stage (TNM classification)   |                                                                 |                                                                 |         |
| T1                                 | 1.67 $\pm$ 1.62 <sup>b</sup>                                    | 2.44 $\pm$ 1.38 <sup>b</sup>                                    | 0.57    |
| T2                                 | 1.36 [0.41-3.12] <sup>a</sup>                                   | 1.31 [0.17-2.33] <sup>a</sup>                                   | 0.68    |
| T3                                 | 0.65 [0.25-1.51] <sup>a</sup>                                   | 0.57 [0.31-3.38] <sup>a</sup>                                   | 0.71    |
| T4                                 | 0.83 [0.24-2.97] <sup>a</sup>                                   | 0.67 [0.25-3.11] <sup>a</sup>                                   | >0.99   |
| N0                                 | 0.76 [0.33-3.48] <sup>a</sup>                                   | 0.92 [0.31-2.76] <sup>a</sup>                                   | 0.93    |
| N1                                 | 1.02 [0.24-2.94] <sup>a</sup>                                   | 0.84 [0.27-3.36] <sup>a</sup>                                   | 0.75    |
| N2                                 | 1.43 $\pm$ 0.96 <sup>b</sup>                                    | 1.25 $\pm$ 0.97 <sup>b</sup>                                    | 0.66    |
| N3                                 | 0.54 $\pm$ 0.12 <sup>b</sup>                                    | 0.67 $\pm$ 0.60 <sup>b</sup>                                    | 0.76    |
| Histologic grade                   |                                                                 |                                                                 |         |
| G1                                 | 0.76 [0.57-3.12] <sup>a</sup>                                   | 0.73 [0.17-1.80] <sup>a</sup>                                   | 0.93    |
| G2                                 | 0.90 [0.24-3.48] <sup>a</sup>                                   | 1.28 [0.25-3.38] <sup>a</sup>                                   | 0.90    |
| G3                                 | 0.71 $\pm$ 0.39 <sup>b</sup>                                    | 0.49 $\pm$ 0.10 <sup>b</sup>                                    | 0.34    |
| Anatomical site                    |                                                                 |                                                                 |         |
| Larynx                             | 0.84 [0.25-2.97] <sup>a</sup>                                   | 0.63 [0.25-3.38] <sup>a</sup>                                   | 0.98    |
| Oral cavity                        | 0.95 [0.24-3.48] <sup>a</sup>                                   | 0.90 [0.27-3.63] <sup>a</sup>                                   | 0.76    |
| Oropharynx                         | 1.48 $\pm$ 1.42 <sup>b</sup>                                    | 0.98 $\pm$ 1.15 <sup>b</sup>                                    | 0.80    |

The *METTL3* transcript levels were measured in triplicates and standardized by *GAPDH* reference gene, relative gene expression were calculate using Pfaffl method. Depending on the data distribution we performed the U Mann-Whitney test<sup>a</sup> or unpaired t-test with Welch's correction<sup>b</sup>.

**Table S4.** *FTO* transcript levels in cancerous and histopathologically unchanged tissue sample from patient with HNSCC.

| Characteristic                     | Cancerous tissue                                                | Histopathologically unchanged tissue                            | p-value |
|------------------------------------|-----------------------------------------------------------------|-----------------------------------------------------------------|---------|
|                                    | Median (range) <sup>a</sup> or<br>Mean ( $\pm$ SD) <sup>b</sup> | Median (range) <sup>a</sup> or<br>Mean ( $\pm$ SD) <sup>b</sup> |         |
| Age at the time of surgery (years) |                                                                 |                                                                 |         |
| ≤60                                | 1.06 [0.31-3.64] <sup>a</sup>                                   | 1.65 [0.14-4.07] <sup>a</sup>                                   | 0.66    |
| >60                                | 1.20 [0.41-3.10] <sup>a</sup>                                   | 0.87 [0.33-3.10] <sup>a</sup>                                   | 0.48    |
| Gender                             |                                                                 |                                                                 |         |
| Male                               | 1.15 [0.31-3.64] <sup>a</sup>                                   | 0.95 [0.14-3.10] <sup>a</sup>                                   | 0.13    |
| Female                             | 0.96 [0.41-2.58] <sup>a</sup>                                   | 1.17 [0.46-4.07] <sup>a</sup>                                   | 0.55    |
| Tumor stage (TNM classification)   |                                                                 |                                                                 |         |
| T1                                 | 0.84 $\pm$ 0.83 <sup>b</sup>                                    | 1.94 $\pm$ 0.69 <sup>b</sup>                                    | 0.16    |
| T2                                 | 1.47 $\pm$ 0.76 <sup>b</sup>                                    | 1.61 $\pm$ 1.10 <sup>b</sup>                                    | 0.72    |
| T3                                 | 0.53 [0.42-1.52] <sup>a</sup>                                   | 0.51 [0.33-1.45] <sup>a</sup>                                   | 0.71    |
| T4                                 | 1.48 $\pm$ 0.97 <sup>b</sup>                                    | 0.99 $\pm$ 0.60 <sup>b</sup>                                    | 0.10    |
| N0                                 | 0.59 [0.42-2.35] <sup>a</sup>                                   | 1.03 [0.34-2.06] <sup>a</sup>                                   | 0.29    |
| N1                                 | 1.34 [0.41-3.64] <sup>a</sup>                                   | 1.16 [0.33-4.07] <sup>a</sup>                                   | 0.92    |
| N2                                 | 1.41 $\pm$ 0.89 <sup>b</sup>                                    | 1.12 $\pm$ 0.59 <sup>b</sup>                                    | 0.46    |
| N3                                 | 0.49 $\pm$ 0.07 <sup>b</sup>                                    | 0.57 $\pm$ 0.47 <sup>b</sup>                                    | 0.80    |
| Histologic grade                   |                                                                 |                                                                 |         |
| G1                                 | 1.07 $\pm$ 0.52 <sup>b</sup>                                    | 1.12 $\pm$ 0.62 <sup>b</sup>                                    | 0.88    |
| G2                                 | 1.47 [0.31-3.64] <sup>a</sup>                                   | 1.11 [0.28-4.07] <sup>a</sup>                                   | 0.15    |
| G3                                 | 0.54 [0.43-0.71] <sup>a</sup>                                   | 0.57 [0.33-3.10] <sup>a</sup>                                   | >0.99   |
| Anatomical site                    |                                                                 |                                                                 |         |
| Larynx                             | 1.47 [0.42-3.64] <sup>a</sup>                                   | 0.78 [0.28-2.38] <sup>a</sup>                                   | 0.17    |
| Oral cavity                        | 1.10 [0.31-2.89] <sup>a</sup>                                   | 1.16 [0.34-4.07] <sup>a</sup>                                   | 0.85    |
| Oropharynx                         | 0.95 $\pm$ 0.54 <sup>b</sup>                                    | 1.37 $\pm$ 1.54 <sup>b</sup>                                    | 0.69    |

The *FTO* transcript levels were measured in triplicates and standardized by *GAPDH* reference gene, relative gene expression were calculate using Pfaffl method. Depending on the data distribution we performed the U Mann-Whitney test<sup>a</sup> or unpaired t-test with Welch's correction<sup>b</sup>.

**Table S5.** *YTHDF2* transcript levels in cancerous and histopathologically unchanged tissue sample from patient with HNSCC.

| Characteristic                     | Cancerous tissue                                                | Histopathologically unchanged tissue                            | p-value |
|------------------------------------|-----------------------------------------------------------------|-----------------------------------------------------------------|---------|
|                                    | Median (range) <sup>a</sup> or<br>Mean ( $\pm$ SD) <sup>b</sup> | Median (range) <sup>a</sup> or<br>Mean ( $\pm$ SD) <sup>b</sup> |         |
| Age at the time of surgery (years) |                                                                 |                                                                 |         |
| ≤60                                | 0.87 [0.07-4.95] <sup>a</sup>                                   | 0.92 [0.14-4.50] <sup>a</sup>                                   | 0.79    |
| >60                                | 1.39 [0.32-5.33] <sup>a</sup>                                   | 1.10 [0.10-4.22] <sup>a</sup>                                   | 0.89    |
| Gender                             |                                                                 |                                                                 |         |
| Male                               | 1.00 [0.07-5.33] <sup>a</sup>                                   | 0.99 [0.10-4.22] <sup>a</sup>                                   | 0.84    |
| Female                             | 1.35 [0.38-4.95] <sup>a</sup>                                   | 1.03 [0.14-4.50] <sup>a</sup>                                   | 0.76    |
| Tumor stage (TNM classification)   |                                                                 |                                                                 |         |
| T1                                 | 0.71 $\pm$ 0.90 <sup>b</sup>                                    | 2.76 $\pm$ 2.46 <sup>b</sup>                                    | 0.38    |
| T2                                 | 1.88 $\pm$ 1.24 <sup>b</sup>                                    | 1.60 $\pm$ 1.24 <sup>b</sup>                                    | 0.64    |
| T3                                 | 0.60 [0.32-2.74] <sup>a</sup>                                   | 0.52 [0.10-1.98] <sup>a</sup>                                   | 0.80    |
| T4                                 | 1.01 [0.32-5.33] <sup>a</sup>                                   | 1.00 [0.14-4.22] <sup>a</sup>                                   | 0.99    |
| N0                                 | 1.10 [0.07-5.33] <sup>a</sup>                                   | 1.27 [0.17-4.22] <sup>a</sup>                                   | 0.56    |
| N1                                 | 1.00 [0.32-2.24] <sup>a</sup>                                   | 1.04 [0.13-4.50] <sup>a</sup>                                   | 0.95    |
| N2                                 | 1.22 [0.38-4.95] <sup>a</sup>                                   | 0.98 [0.20-3.32] <sup>a</sup>                                   | 0.82    |
| N3                                 | 0.67 $\pm$ 0.54 <sup>b</sup>                                    | 0.39 $\pm$ 0.37 <sup>b</sup>                                    | 0.50    |
| Histologic grade                   |                                                                 |                                                                 |         |
| G1                                 | 1.69 $\pm$ 0.89 <sup>b</sup>                                    | 1.29 $\pm$ 0.74 <sup>b</sup>                                    | 0.43    |
| G2                                 | 0.80 [0.07-5.33] <sup>a</sup>                                   | 0.94 [0.13-4.22] <sup>a</sup>                                   | 0.74    |
| G3                                 | 1.58 $\pm$ 1.15 <sup>b</sup>                                    | 0.85 $\pm$ 0.67 <sup>b</sup>                                    | 0.34    |
| Anatomical site                    |                                                                 |                                                                 |         |
| Larynx                             | 1.31 [0.32-5.33] <sup>a</sup>                                   | 0.98 [0.10-4.22] <sup>a</sup>                                   | 0.75    |
| Oral cavity                        | 0.92 [0.07-4.95] <sup>a</sup>                                   | 1.01 [0.13-4.50] <sup>a</sup>                                   | 0.75    |
| Oropharynx                         | 2.19 $\pm$ 0.93 <sup>b</sup>                                    | 0.76 $\pm$ 0.71 <sup>b</sup>                                    | 0.15    |

The *YTHDF2* transcript levels were measured in triplicates and standardized by *GAPDH* reference gene, relative gene expression were calculate using Pfaffl method. Depending on the data distribution we performed the U Mann-Whitney test<sup>a</sup> or unpaired t-test with Welch's correction<sup>b</sup>.

**Table S6.** *YTHDC2* transcript levels in cancerous and histopathologically unchanged tissue sample from patient with HNSCC.

| Characteristic                     | Cancerous tissue                                                | Histopathologically unchanged tissue                            | p-value |
|------------------------------------|-----------------------------------------------------------------|-----------------------------------------------------------------|---------|
|                                    | Median (range) <sup>a</sup> or<br>Mean ( $\pm$ SD) <sup>b</sup> | Median (range) <sup>a</sup> or<br>Mean ( $\pm$ SD) <sup>b</sup> |         |
| Age at the time of surgery (years) |                                                                 |                                                                 |         |
| ≤60                                | 0.93 [0.01-3.89] <sup>a</sup>                                   | 1.36 [0.18-4.38] <sup>a</sup>                                   | 0.29    |
| >60                                | 1.18 [0.12-4.38] <sup>a</sup>                                   | 1.40 [0.19-4.52] <sup>a</sup>                                   | 0.82    |
| Gender                             |                                                                 |                                                                 |         |
| Male                               | 0.98 [0.13-4.38] <sup>a</sup>                                   | 1.46 [0.19-4.52] <sup>a</sup>                                   | 0.25    |
| Female                             | 1.37 [0.01-3.04] <sup>a</sup>                                   | 1.03 [0.18-4.38] <sup>a</sup>                                   | 0.62    |
| Tumor stage (TNM classification)   |                                                                 |                                                                 |         |
| T1                                 | 1.47 $\pm$ 1.32 <sup>b</sup>                                    | 2.12 $\pm$ 0.87 <sup>b</sup>                                    | 0.52    |
| T2                                 | 1.42 $\pm$ 0.88 <sup>b</sup>                                    | 1.46 $\pm$ 1.23 <sup>b</sup>                                    | 0.92    |
| T3                                 | 1.11 [0.50-3.14] <sup>a</sup>                                   | 2.04 [0.19-2.84] <sup>a</sup>                                   | 0.51    |
| T4                                 | 0.76 [0.12-4.38] <sup>a</sup>                                   | 1.32 [0.26-4.52] <sup>a</sup>                                   | 0.75    |
| N0                                 | 1.26 [0.38-4.32] <sup>a</sup>                                   | 1.93 [0.38-4.52] <sup>a</sup>                                   | 0.61    |
| N1                                 | 0.70 [0.50-1.77] <sup>a</sup>                                   | 1.04 [0.26-2.10] <sup>a</sup>                                   | 0.75    |
| N2                                 | 1.72 $\pm$ 1.43 <sup>b</sup>                                    | 1.66 $\pm$ 1.21 <sup>b</sup>                                    | 0.92    |
| N3                                 | 1.03 $\pm$ 0.32 <sup>b</sup>                                    | 0.63 $\pm$ 0.41 <sup>b</sup>                                    | 0.26    |
| Histologic grade                   |                                                                 |                                                                 |         |
| G1                                 | 1.58 $\pm$ 0.55 <sup>b</sup>                                    | 1.46 $\pm$ 0.84 <sup>b</sup>                                    | 0.80    |
| G2                                 | 0.98 [0.01-4.98] <sup>a</sup>                                   | 1.57 [0.18-4.52] <sup>a</sup>                                   | 0.47    |
| G3                                 | 1.54 $\pm$ 1.31 <sup>b</sup>                                    | 1.71 $\pm$ 1.37 <sup>b</sup>                                    | 0.88    |
| Anatomical site                    |                                                                 |                                                                 |         |
| Larynx                             | 1.26 [0.55-4.38] <sup>a</sup>                                   | 2.10 [0.19-4.52] <sup>a</sup>                                   | 0.84    |
| Oral cavity                        | 0.95 [0.01-2.94] <sup>a</sup>                                   | 1.31 [0.18-4.38] <sup>a</sup>                                   | 0.70    |
| Oropharynx                         | 0.97 $\pm$ 0.73 <sup>b</sup>                                    | 0.87 $\pm$ 0.22 <sup>b</sup>                                    | 0.85    |

The *YTHDC2* transcript levels were measured in triplicates and standardized by *GAPDH* reference gene, relative gene expression were calculate using Pfaffl method. Depending on the data distribution we performed the U Mann-Whitney test<sup>a</sup> or unpaired t-test with Welch's correction<sup>b</sup>.
